# Supplementary material for: Antiedematogenic and Anti-Inflammatory Activity of the Monoterpene Isopulegol and Its β-Cyclodextrin (β-CD) Inclusion Complex in Animal Inflammation Models
Source: PubMed Central journal article supplement (PMC7278878; doi:10.3390/foods9050630), 2020-05-14
Supplement: foods-09-00630-s001.pdf [file foods-09-00630-s001.pdf]

## All Figures

**Figure A1** - Effect of ISO and ISO/ $\beta$ -CD (1, 5 and 10 mg/kg/v.o.) on paw edema induced by intraplantar injection of 1% carrageenan in mice.

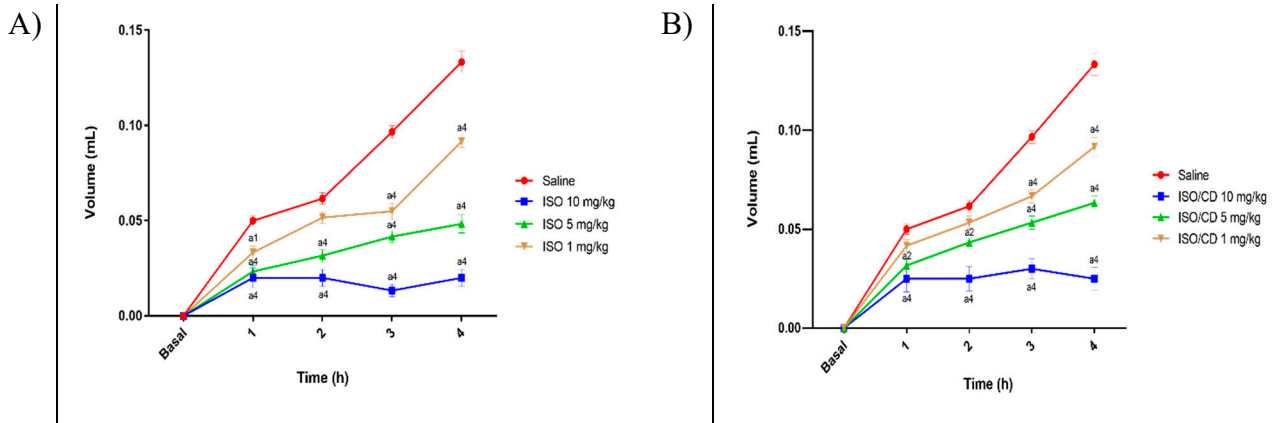

Effect of ISO (A) and ISO/ $\beta$ -CD (1, 5 and 10 mg/kg/v.o.) (B) on paw edema induced by the intraplantar injection of 1% carrageenan in mice up to the 4th hour. Values represent the mean  $\pm$  S.E.M. (n=6/group). Statistical analysis: Two-way ANOVA followed by Tukey's Test with multiple comparisons (a1

**Figure A2** - Effect of ISO and ISO/ $\beta$ -CD (1, 5 and 10 mg/kg/v.o.) on paw edema induced by intraplantar injection of 1% dextran in mice.

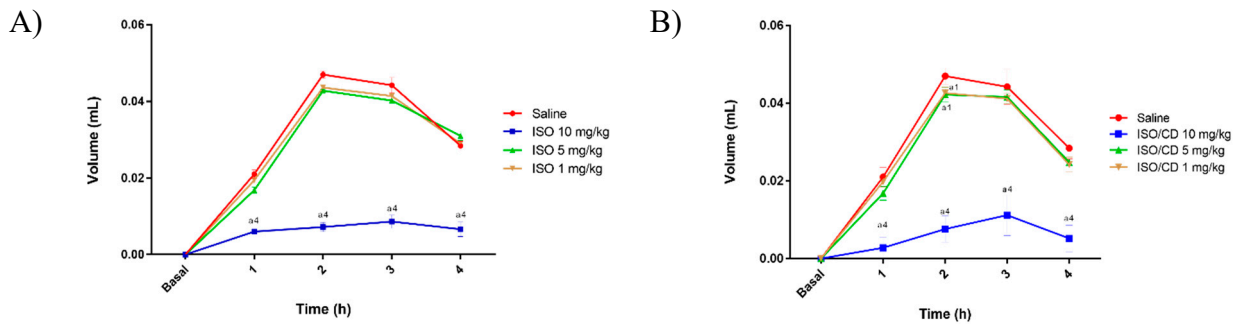

Effect of ISO (A) and ISO/ $\beta$ -CD (1, 5 and 10 mg/kg/v.o.) (B) on paw edema induced by the intraplantar injection of 1% dextran in mice up to the 4th hour. Values represent the mean  $\pm$  S.E.M. (n=6/group). Statistical analysis: Two-way ANOVA followed by Tukey's Test with multiple comparisons (a1

**Figure A3** - Effect of ISO and ISO/ $\beta$ -CD (1, 5 and 10 mg/kg/v.o.) on paw edema induced by intraplantar injection of 1% histamine in mice.

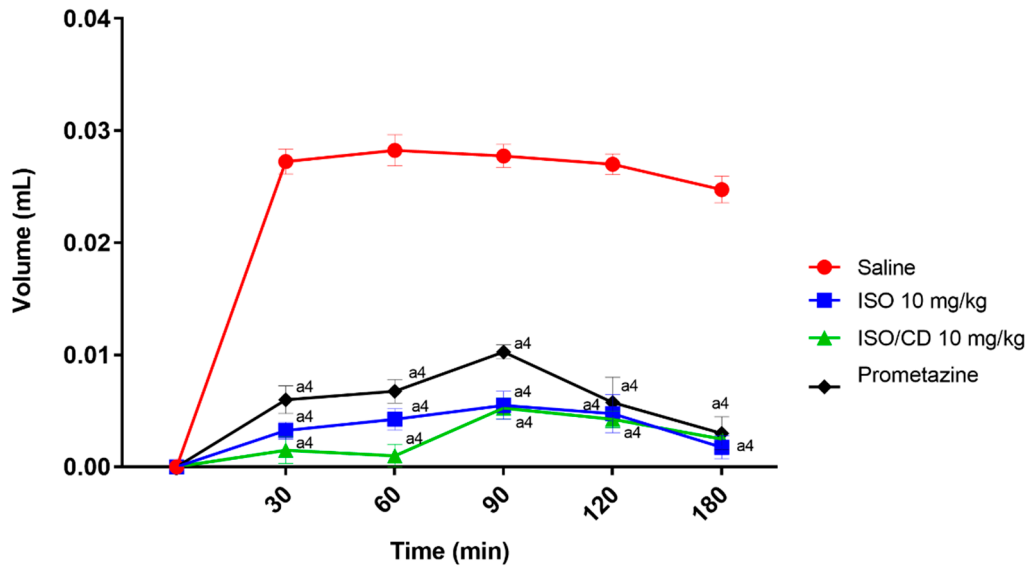

Effect of ISO (A) and ISO/ $\beta$ -CD (1, 5 and 10 mg/kg/v.o.) (B) on paw edema induced by the intraplantar injection of 1% histamine in mice up to 180 minutes. Values represent the mean  $\pm$  S.E.M. (n=6/group). Statistical analysis: Two-way ANOVA followed by Tukey's Test with multiple comparisons (a1p<0.05; a2p <0.01; a3p <0.001; a4p <0.0001 vs. saline).

**Figure A4** - Effect of ISO and ISO/ $\beta$ -CD (1, 5 and 10 mg/kg/v.o.) on paw edema induced by intraplantar injection of prostaglandin E2 in mice.

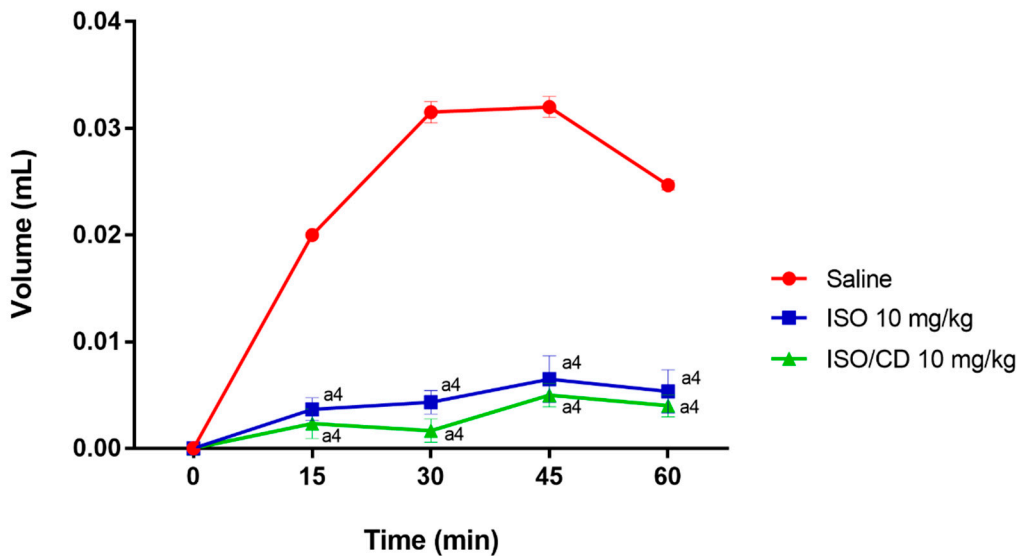

Effect of ISO (A) and ISO/ $\beta$ -CD (1, 5 and 10 mg/kg/v.o.) (B) on paw edema induced by the intraplantar injection of PGE2 in mice up to 60 minutes. Values represent the mean  $\pm$  S.E.M. (n=6/group). Statistical analysis: Two-way ANOVA followed by Tukey's Test with multiple comparisons (a1p<0.05; a2p <0.01; a3p <0.001; a4p <0.0001 vs. saline).

**Figure A5** - Effect of ISO and ISO/ $\beta$ -CD (10 mg/kg/v.o.) on leukocyte migration in 1% carrageenan-induced peritonitis.

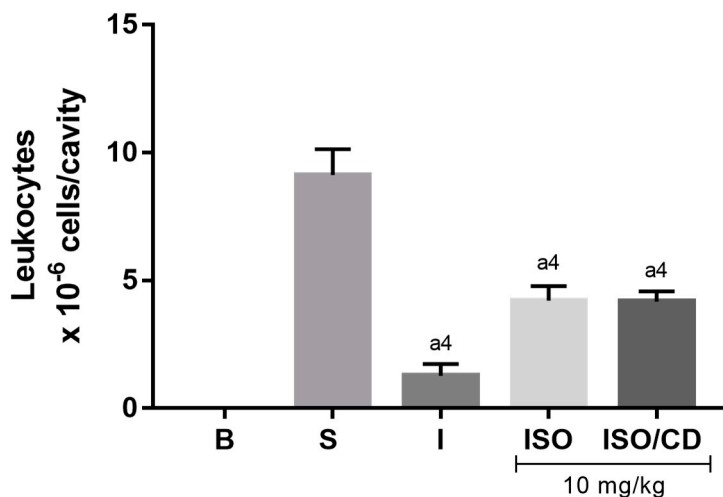

Effect of ISO and ISO/ $\beta$ -CD (10 mg/kg/v.o.) on leukocyte migration in peritonitis induced by 1% carrageenan in mice (B: blank; S: control/saline; I: indomethacin 25 mg/kg). Values represent the mean  $\pm$  S.E.M (n=6/group). One-way ANOVA followed by Tukey's Test with multiple comparisons (a1 $p$ <0.05; a2 $p$ <0.01; a3 $p$ <0.001; a4 $p$ <0.0001 vs. saline).

**Figure A6** - Effect of ISO and ISO/ $\beta$ -CD (10 mg/kg/v.o.) on protein extravasation in 1% carrageenan-induced peritonitis.

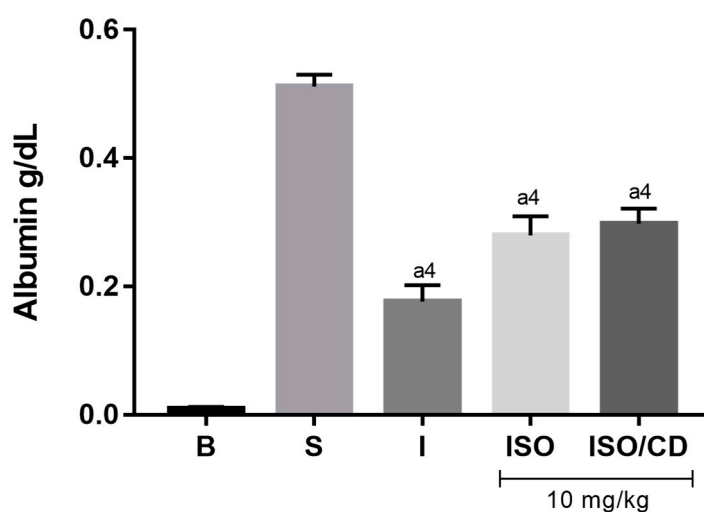

Effect of ISO and ISO/ $\beta$ -CD (10 mg/kg/v.o.) on protein extravasation in peritonitis induced by 1% carrageenan in mice (B: blank; S: control/saline; I: indomethacin 25 mg/kg). Values represent the mean  $\pm$

S.E.M (n=6/group). One-way ANOVA followed by Tukey's Test with multiple comparisons (a1p<0.05; a2p <0.01; a3p <0.001; a4p <0.0001 vs. saline)

**Figure A7** - Effect of ISO and ISO/ $\beta$ -CD (10 mg/kg/v.o.) on MPO activity in 1% carrageenan-induced peritonitis.

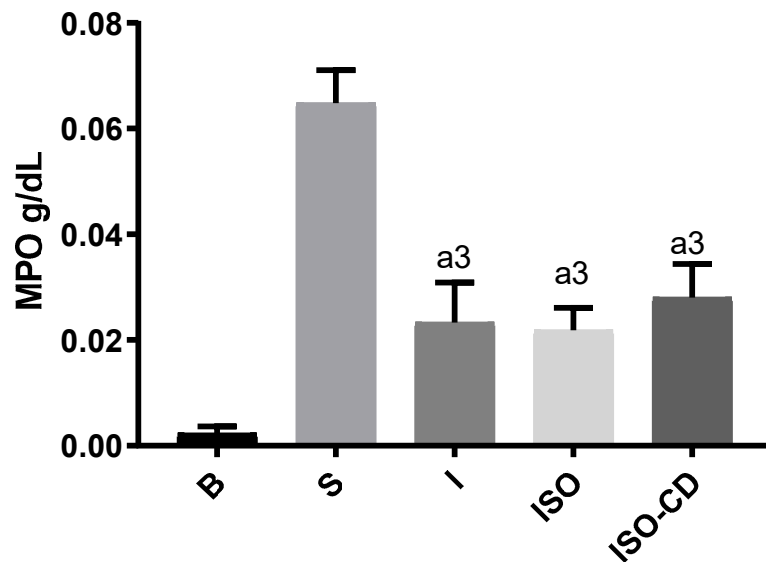

Effect of ISO and ISO/ $\beta$ -CD (10 mg/kg/v.o.) on MPO activity in peritonitis induced by 1% carrageenan in mice (B: blank; S: control/saline; I: indomethacin 25 mg/kg). Values represent the mean  $\pm$  S.E.M (n=6/group). One-way ANOVA followed by Tukey's Test with multiple comparisons (a1p<0.05; a2p <0.01; a3p <0.001; a4p <0.0001 vs. saline).

**Figure A8** - Effect of ISO and ISO/ $\beta$ -CD (10 mg/kg/v.o.) in the leukocytes migration in mice submitted to carrageenan-induced pleurisy.

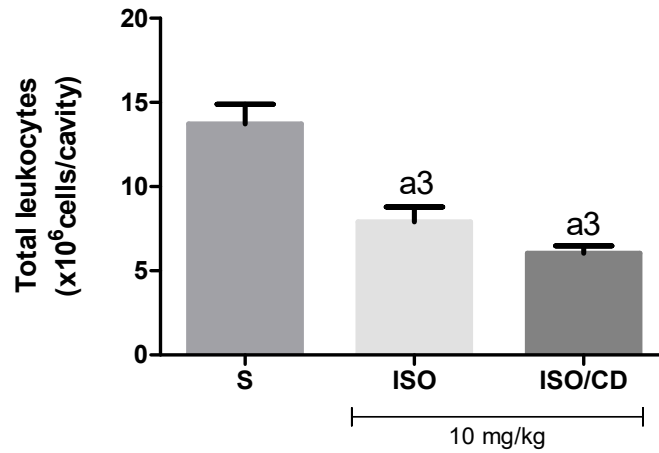

Effect of ISO e ISO/ $\beta$ -CD (10 mg/kg/v.o.) in the leukocytes migration in mice submitted to carrageenan-induced pleurisy. (S: control/saline). Data were expressed as mean  $\pm$  SEM of 6 animals. Statistical analysis: One-way ANOVA followed by *Tukey's test* with multiple comparisons. (a1 $p$ <0,05; a2 $p$ <0,01; a3 $p$ <0,001; a4 $p$ <0,0001 vs. saline).

**Figure A9** - Effect of ISO and ISO/ $\beta$ -CD (10 mg/kg/v.o.) on granuloma formation.

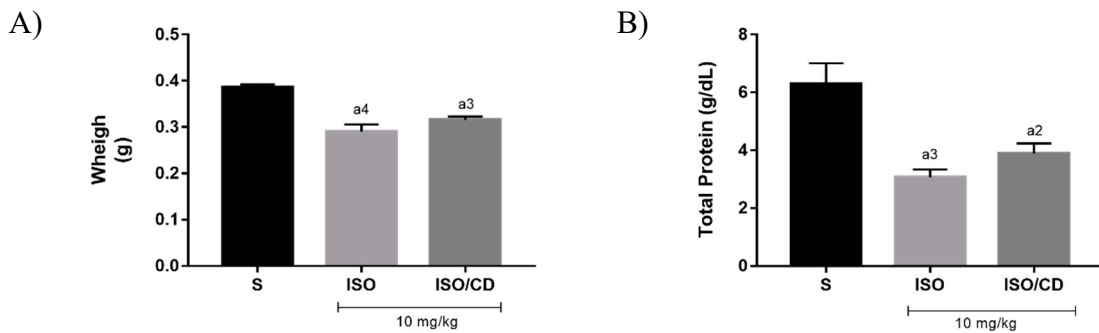

Effect of ISO and ISO/ $\beta$ -CD (10 mg/kg/v.o.) on granuloma formation. (S: control/saline). A) Granuloma weight; B) Total proteins obtained from the granuloma homogenate. Values represent the mean  $\pm$  S.E.M (n=6/group). One-way ANOVA followed by *Tukey's Test* with multiple comparisons (a1 $p$ <0.05; a2 $p$ <0.01; a3 $p$ <0.001; a4 $p$ <0.0001 vs. saline).
